## 1 **Effect of host-switching on the eco-evolutionary patterns of parasites**

2 <sup>1\*</sup>Elvira D’Bastiani, <sup>2</sup>Débora Princepe, <sup>2,3</sup>Flavia MD Marquitti, <sup>1,4</sup>Walter A Boeger, <sup>1,4</sup>Karla M  
3 Campião, <sup>1,5</sup>Sabrina LB Araujo

4 <sup>1</sup>Laboratório de Interações Biológicas, Programa de Pós-Graduação em Ecologia e  
5 Conservação, Universidade Federal do Paraná, UFPR - Curitiba, Paraná, Brasil

6 <sup>2</sup>Instituto de Física "Gleb Wataghin", Universidade Estadual de Campinas, UNICAMP -  
7 Campinas, São Paulo, Brasil

8 <sup>3</sup>Instituto de Biologia, Universidade Estadual de Campinas, UNICAMP - Campinas, São  
9 Paulo, Brasil

10 <sup>4</sup>Departamento de Zoologia, Universidade Federal do Paraná, UFPR - Curitiba, Paraná, Brasil

11 <sup>5</sup>Departamento de Física, Universidade Federal do Paraná, UFPR - Curitiba, Paraná, Brasil

12 \*Corresponding author: Elvira D’Bastiani e-mail: [elviradbastiani@gmail.com](mailto:elviradbastiani@gmail.com)

13

14 SHORT RUNNING TITLE: Host-switching influences parasite patterns

15

16 ABSTRACT

17 Increasing empirical evidence has revealed that host-switching are common in the history of

18 parasites. Still, few have explored how the evolutionary histories of hosts might influence

19 such switches and then the evolution of parasites. Here, we investigated how the intensity of

20 host-switching, assumed to depend on the phylogenetic distance between hosts, affects the

21 ecological and evolutionary patterns of parasite species. We developed an individual-based

22 model where parasites can explore and colonise hosts under variable host-switching intensity

23 and have evolution driven by mutation, genetic drift, and mating restriction. We hypothesised

24 that our model can reproduce ecological and evolutionary patterns of empirical communities,

25 characterised by turnover among host species and tree imbalance, respectively. We found an  
26 optimum range of host-switching intensity that can predict similar patterns as those observed  
27 in the empirical studies, validating our hypothesis. Our results showed that the turnover  
28 decreased as the host-switching intensity increased with low variation among the model  
29 replications. On the other hand, the tree imbalance had not a monotonic tendency but a wide  
30 variation. These results revealed that while the tree imbalance is a sensitive metric to  
31 stochastic events, the turnover may be a proxy for host switching. Furthermore, local  
32 empirical studies corresponded to higher host-switching intensity when compared to regional  
33 studies, highlighting that spatial scale is probably the crucial limitation of host-switching.  
34 **KEYWORDS:** dispersal of parasites, opportunity and compatibility of interaction, phylogenetic  
35 conservatism, and structure of the community of parasites.

36

## 37 INTRODUCTION

38 The dispersal of parasite individuals followed by colonisation of a new host lineage,  
39 known as host-switching, is a common event observed during the evolutionary trajectory of  
40 many parasite lineages (De Vienne et al. 2013). Initially, host-switching results in the increase  
41 of the host repertoire of a parasite (Braga et al. 2021). The colonisation of the new hosts can  
42 result in reproductive isolation, and consequently in speciation of parasite lineages,  
43 characterising the dynamics of the Oscillation Hypothesis (Nylin and Soren 2018). Empirical  
44 examples showing high levels of host-switching include symbiotic interactions ranging from  
45 host-parasite (Meinilä et al. 2004; Agosta et al. 2010; Müller et al. 2018, Fecchio et al. 2019;  
46 Boyd et al. 2022) and plant-insect systems to microbial pathogens (Woolhouse et al. 2005),  
47 brood parasitism (Habermannová et al. 2013; Dominguez et al. 2015), plant-feeding insects,  
48 and parasitic plants (Nylin et al. 2014). Consequently, understanding the factors influencing

49 the success of host-switching and subsequent speciation events is critical for understanding  
50 parasites diversification.

51 A general framework that has been used to understand infectious disease, the Stockholm  
52 Paradigm, explores the evolutionary dynamics of host-parasite associations (Brooks et al.  
53 2014; Brooks et al. 2019). This framework suggests that parasites perform host-switching by  
54 ecological fitting hypothesis (Agosta and Klemmens 2008; Agosta and Brooks 2020).  
55 Ecological fitting explains how the process whereby organisms colonise and persist in novel  
56 environments, use novel resources, or form novel associations with other species through a set  
57 of traits/capabilities they already possess (see Agosta and Klemmens 2008; Brooks et al.  
58 2014; Brooks et al. 2019; Agosta and Brooks 2020). The expression of these unexplored  
59 capabilities is mediated by the opportunity of interaction (temporal and spatial) and  
60 determines the possibility of encounters between hosts and unfamiliar parasites. After the  
61 encounter, and if the interaction is compatible, it is followed by the resolution of subsequent  
62 conflicts that emerge from the basic dynamics of “living together”, which should result in co-  
63 accommodation (Brooks and McLennan 2002; Araujo et al. 2015).

64 Ecological and life-history traits also influence the chances of parasites dispersing from  
65 one host species to another. Characteristics of all organisms within the interaction system,  
66 such as niche similarity among host species, modes of transmission of parasites, dietary  
67 preferences of the vector (if there is one), and also ecosystemic characteristics as the host  
68 community composition and shared phylogenetic history are relevant factors that define the  
69 chances of host-switching (Bush et al. 2006; Jaramillo and Rivera-Parra 2018). Niche  
70 similarity among host species is one fundamental element constraining the incorporation of  
71 new host species by ecological fitting. This is because the capacity of a parasite species to use  
72 new resources is related to the phylogenetic conservatism of the resource provided by the host

73 species. Phylogenetic distance between the original and new host species can represent an  
74 adequate proxy for the nature of the resource, which is tracked by the parasite lineage  
75 (Charleston and Robertson 2002; Agosta and Klemmens 2008; Engelstädter and Fortuna  
76 2019). Consequently, the host phylogenetic conservatism can define the arena of possibilities  
77 for host-switching.

78 Several studies have indicated the ubiquity of host-switching in nature (see Cuthill and  
79 Charleston 2013; De Vienne et al. 2013; Engelstädter and Fortuna 2019; Fecchio et al. 2019;  
80 Hayward et al. 2021), but (or yet) few studies have explored to which extent the switches are  
81 constrained by inherited possibilities and limitations across hosts evolutionary histories.  
82 Among many potential factors determining host-switching, it seems that host phylogeny and  
83 geographic distributions are two major players (Sanaei et al. 2021). Moreover, the relation  
84 between host-switching and the opportunity for parasite dispersal, as well as their capacity to  
85 explore new hosts, is mostly unexplored (Brooks et al. 2019). Here, we aim to fill these  
86 unexplored gaps by proposing a novel approach to investigate how the intensity of host-  
87 switching affects the ecology and phylogenetic history of the parasites. For this, we assume  
88 that compatibility and the opportunity for interaction (spatial and temporal) may be expressed  
89 through the evolutionary histories of the hosts, and this can influence the host-switching  
90 events.

91 In this study, we propose a theoretical model based on parasite individuals that can  
92 switch among host species and speciate over time. Host-switching is mediated by  
93 phylogenetic conservatism; that is, the probability of parasites switching hosts decreases with  
94 increasing divergence in the evolutionary time of the hosts. The overall intensity of host-  
95 switching is a controlled parameter of the model. Under the absence of host-switching, the  
96 model is adjusted to parasites speciate due to limitation of host use, resulting in a pattern of

97 cophylogeny and in paired specialised interaction (each parasite species interacting with one  
98 exclusive host species). We then investigate the eco-evolutionary patterns under different  
99 host-switching intensities, hypothesising that there is an optimum range of host-switching  
100 intensity that can result in the same eco-evolutionary patterns observed in the empirical  
101 studies. These patterns were characterised by species interaction turnover and tree imbalance,  
102 respectively. The model predictions were compared to nine empirical communities, validating  
103 our hypothesis.

104

## 105 MATERIAL AND METHODS

### 106 *The model*

107 We performed simulations of eco-evolutionary trajectories of parasites influenced by  
108 their host evolutionary history and host-switching events using an individual-based model  
109 (IBM). We assumed that the evolutionary history of the host can represent a proxy for the  
110 resources for parasite species (Agosta et al. 2010; Imrie et al. 2021), and also assumed that the  
111 probability of host-switching decreases as the phylogenetic distance between the species of  
112 host involved in the event (original and new host species) increases (Araujo et al. 2015;  
113 Engelstädter and Fortuna 2019). The model assumes that parasite evolution occurs at the same  
114 evolutionary time scale as the host, which increases possibilities for host-switching as host  
115 speciation occurs (Fig. 1a-c).

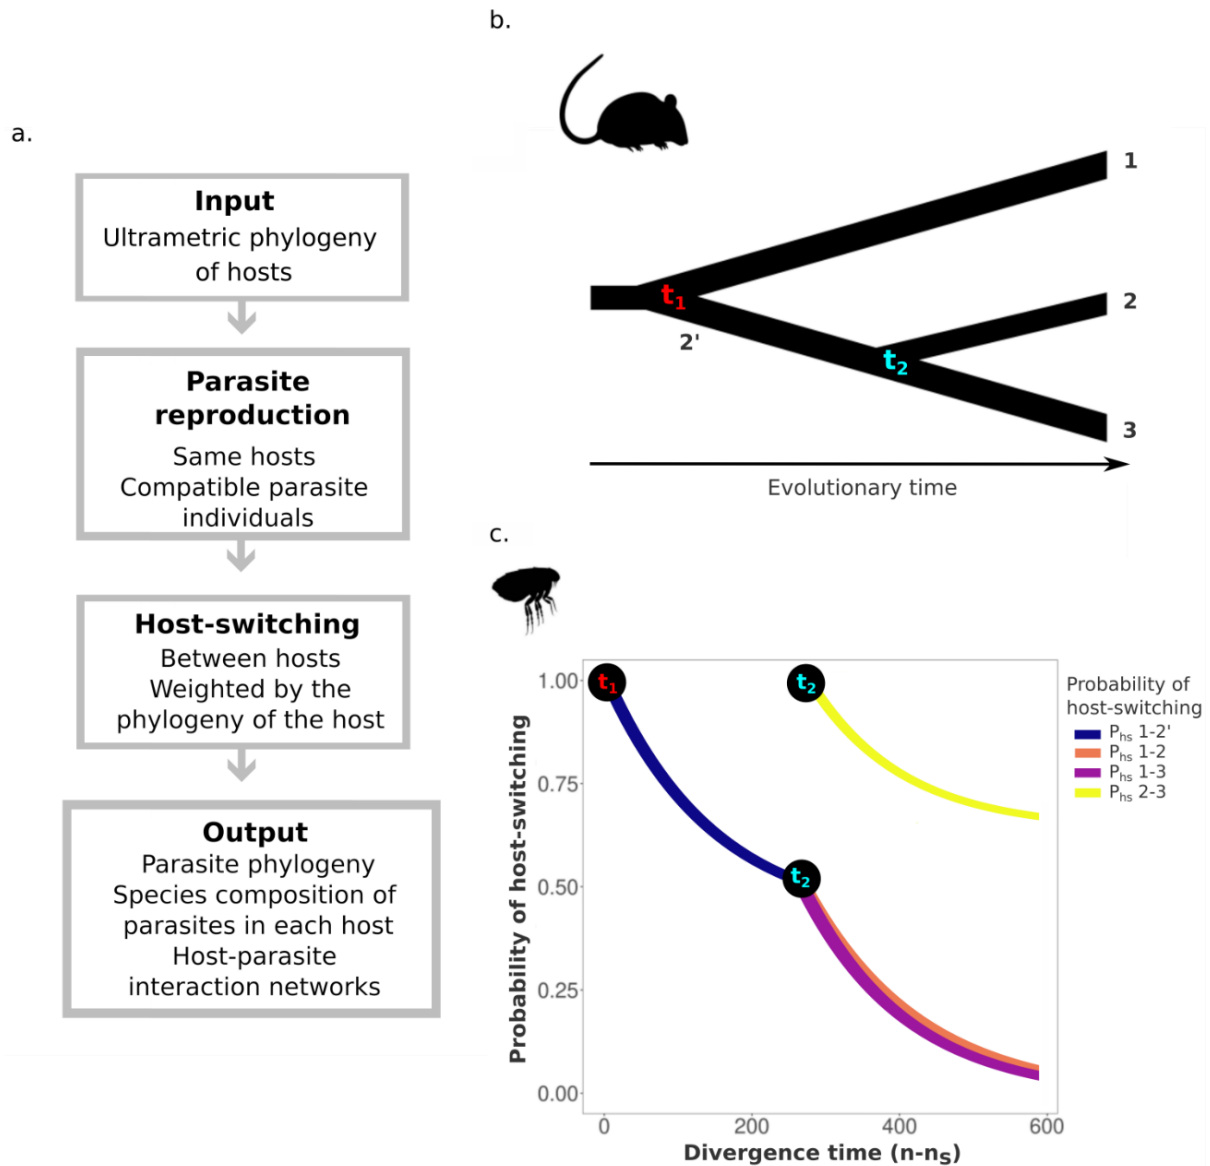

116

117 FIGURE 1. Schematic representation of the model. **a.** The general sequence of the model

118 dynamics. **b.** Hypothetical host phylogeny. **c.** Probability of host-switching ( $P_{hs}$ ) over time.

119 Each parasite individual can host-switch after the first speciation event ( $t_1$ ). One host is drawn

120 for each parasite individual, and the probability of a successful host-switching depends on the

121 divergent time between the two involved hosts. At  $t_1$  the first speciation event occurs, and the

122 probability of host-switching is maximum. As time goes on, this probability decreases. At  $t_2$

123 another speciation event occurs, increasing the number of migration possibilities. At this time

124 the two younger host species (2 and 3) have the maximum probability of switching hosts ( $P_{hs}$

125 2-3), but the probability of host-switching between 1 and 2 or between 1 and 3 keeps  
126 decreasing. The colors highlight the 2', 1, 2, and 3 host lineages presented in **b**.

127

128 Parasite individuals are explicitly described by biallelic sequences of infinite sites, a  
129 simplified form to represent their genomes and heritable trait. Individuals are monoic and  
130 engage in sexual reproduction, with non-overlapping generations, following the model  
131 proposed by Higgs and Derrida (1991) and Manzo and Peliti (1994). Population evolution is  
132 driven by mutation, genetic drift, and restriction to mating in the absence of natural selection.  
133 With a certain set of parameters, parasite speciation occurs. Each parasite individual is also  
134 characterised by the host species that it interacts. The host species are modelled as resources  
135 that impose a carrying capacity of  $K$  parasite individuals, analogous to islands in the Manzo-  
136 Peliti model (Manzo and Peliti 1994), but, in our model, the islands (hosts species in our case)  
137 emerge (as a new host species that speciate) according to a predetermined host diversification  
138 time (i.e. based on ultrametric empirical phylogenies - an ultrametric tree is a kind of additive  
139 tree in which the tips of the trees are all equidistant from the root of the tree). Thus, the  
140 overall carrying capacity increases by  $K$  individuals at each new host speciation. The model  
141 does not consider the selection pressure imposed by parasites on the evolution of the resource  
142 (host). Therefore, we are not modelling a process of reciprocal evolution, or co-evolution.

143

#### 144 *Reproduction of parasites*

145 Reproduction is sexual and occurs between parasite individuals that are in the same host  
146 and that have a minimum genetic similarity,  $q_{\min}$ , measured based on the Hamming distance  
147 between genomes. In each host species, at each generation,  $K$  offspring individuals replace the  
148 parental population, with no generation overlapping. We establish a maximum of  $K$  random

149 trials with reposition to find one compatible partner. The offspring is generated by *locus*  
150 recombination of the parents and each *locus* has a probability of mutation ( $\mu$ ). We set  $q_{min} =$   
151  $0.5q_0$ , where  $q_0$  is the expected mean similarity within one population in equilibrium:  $q_0 =$   
152  $\frac{l}{l+4\mu K}$ . For a detailed demonstration of the above equation see SI1. The restriction  $q_{min} =$   
153  $0.5q_0$  is arbitrary and only assures that no parasite speciation occurs when using a unique host  
154 (i.e., avoids sympatric speciation in the context of Higgs and Derrida (1991)). Consequently,  
155 parasite speciation only happens when more than one host species is used.

156

### 157 *Temporal scaling*

158 The empirical studies have evolutionary times in the order of millions of years, and to  
159 maintain this time scale in the model would demand a high computational cost. As proposed  
160 by Costa et al. (2019), in our approach we adopted a high value of mutation rate ( $\mu=0.025$ ) in  
161 order to decrease the number of iterations (time steps or generations) necessary for speciation  
162 to occur. Furthermore, we assumed that, due to the shorter life cycle of parasites, they have a  
163 faster speciation rate when compared to their hosts (Dowton and Austin 1995; Light and  
164 Hafner 2007). To satisfy these conditions, we rescaled the whole host phylogeny assuming  
165 that the smaller branch length consists of the minimal time for parasites to speciate due to  
166 isolation by host use (see the demonstration in SM1):

$$167 \quad \tau_a = \frac{l}{4\mu} \log\left(\frac{l}{q_{min}}\right). \quad (2)$$

168 The minimal time for speciation decreases with  $q_{min}$ . Therefore, making the reproduction  
169 more restricted (i.e., increasing  $q_{min}$ ) facilitates the formation of parasite species in a shorter  
170 time. The simulation starts with a clonal parasite population using a unique host species. Also,  
171 the first host speciation occurred only after  $\tau_a$  generations for the parasite populations to  
172 accumulate genetic diversity before the first splitting event.



173

174 *Host-switching events*

175       After the first host speciation, parasite individuals in a host species may switch to  
176 another host. For each parasite individual, we randomly selected a host species, including the  
177 one in use. If the selected host species is not the original host (donor), we follow a probability  
178 function for the host-switching event. This probability of host-switching events ( $P_{hs}$ )  
179 decreases over time, representing the product of opportunity for contact and compatibility of  
180 the interaction of parasites associated with the evolutionary history of hosts (Fig. 1c). Then,  
181 we are assuming that compatibility, the opportunity of interaction are expressed through the  
182 evolutionary history of hosts. The probability of a parasite individual successfully migrates  
183 (host-switching) from one host to another host species, in a given generation  $n$ , is defined as:

184       
$$P_{hs}(n) = \exp[-r * (n - n_s)] . \quad (3)$$

185 where  $r$  is a positive parameter that controls the decay of the host-switching probability, and  
186  $n_s$  is the generation that the common host ancestor had speciated (then,  $n - n_s$  is how long the  
187 two host species had diverged). If  $r = 0$ , these probabilities are equal to 1 regardless of the  
188 host divergence time, meaning that there is no restriction to host-switching. As a  
189 consequence, parasite gene flow is continuous and speciation does not occur. At the other  
190 extreme, for sufficiently large  $r$  values ( $P_{hs} \sim 0$ ), host-switching is absent and cospeciation  
191 between hosts and parasites is expected. For intermediary  $r$  value, some parasite individuals  
192 can eventually switch hosts (Fig. 2 and Fig. S1). This will increase the host repertoire of the  
193 parasitic species, and also enable speciation by isolation (by host use), similar to the  
194 speciation by founder's effect (Mayr 1999; Gavrillets and Hastings 1996). The effect of the  
195 overall host-switching in a community does not depend only on  $r$ , but also on the  
196 particularities of each host phylogeny that is used as input for the calculation of the host-

197 switching probability. Therefore, to better interpret the effect of parameter  $r$  on the trajectories  
198 and compare the results between the communities, we do not present our results in terms of  $r$ ,  
199 but how much it changes the overall host-switching events. To obtain this overall metric, we  
200 calculated the mean percentage of parasite individuals that switch hosts over the entire  
201 simulation and we call it *host-switching intensity* (Fig. 2).

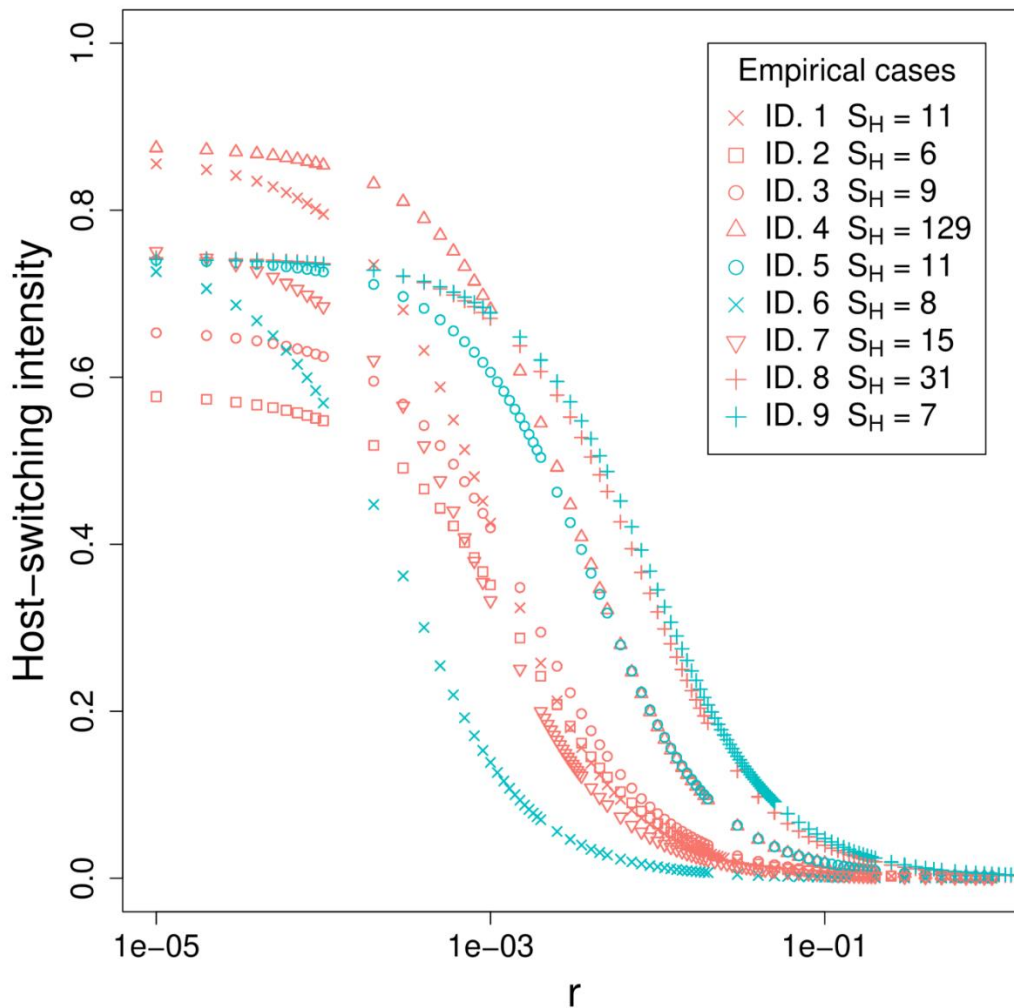

202

203 FIGURE 2. Relation between  $r$  (a parameter that defines the host-switching decay, Eq. 3) and  
204 the intensity of host-switching for each simulated community. Each ID represents empirical  
205 studies and  $S_H$  represents the host richness. ID. 1 - Birds and feather mites. ID. 2 - Mammals  
206 and lice. ID. 3 - Wildlife and ectoparasites. ID. 4 and 5 - Rodents and fleas. ID. 6 - Fish and  
207 Monogeneans (Gyrodactylidae). ID. 7 - Frogs and monogeneans (Polystomatidae). ID. 8 -

208 Frogs and lungworms (*Rhabdias* spp.). ID. 9 - Frogs and gut worms (*Oswaldocruzia* spp.).

209 Regional spatial scale studies are represented by salmon colour and local spatial scale studies  
210 by blue.

211

### 212 *Parameters of the model*

213 For the results presented here we fixed the population size per host ( $K = 250$ ) and  
214 mutation probability per locus ( $\mu = 0.025$ ). With these parameters, we can observe species  
215 formation with reasonable computational time. Since the empirical studies varied in the  
216 number of host species and branch size, the total number of iterations also varied (Table S1).  
217 The parameter  $r$  varied ( $0 < r < 1$ ) for each empirical study. A total of 50 replicates were  
218 performed for each parameter combination. We have also analysed the model predictions  
219 under other values of population size ( $K = \{50, 500, 1000\}$ ) and mutation rate ( $\mu = 0.001$ )  
220 (Table S1). Our qualitative conclusions did not change under these parameter variations (Fig.  
221 S2-S4).

222

### 223 *Validation with empirical data*

224 The development of a new method to assess the host-switching intensity allowed us to  
225 compare the results of our simulations with empirical data from different groups of parasites  
226 and their respective hosts. This method uses information on the evolutionary history of the  
227 host species as a proxy for resource similarity. We used nine studies from empirical studies of  
228 parasite-host associations (Table 1) for comparative purposes. The selection criteria was that,  
229 in addition to information on species interaction, these empirical studies essentially needed to  
230 have phylogenies for hosts and parasites (see the details in Fig. S5-S13). We separated these  
231 empirical studies according to the spatial scale (Table 1). Spatial scale refers to the spatial

232 extent of ecological processes and the spatial interpretation of the data. In this study, we  
233 assumed that studies in the local spatial scale are essentially in a geographic radius less than  
234 or equal to 35km, while on a regional scale they were collected essentially in a geographic  
235 radius greater than 35km, in the original article respectively.

236

237 TABLE 1. Description of the host sample size and parasite richness for each empirical study, of  
238 which host phylogenies were used as model parameters and host-parasite association to  
239 validate the simulations of the model. Legend: ID = Empirical study.

| ID | Host group | Host richness | Parasites group                                             | Parasite richness | Spatial scale | Reference              |
|----|------------|---------------|-------------------------------------------------------------|-------------------|---------------|------------------------|
| 1  | Bird       | 11            | Feather mites<br>( <i>Trouessartia</i> spp.)                | 11                | regional      | Donã et al. 2017       |
| 2  | Mammals    | 6             | Lice<br>( <i>Pediculus</i> spp. and<br><i>Pthirus</i> spp.) | 7                 | regional      | Reed et al. 2007       |
| 3  | Wildlife   | 9             | Arthropods*                                                 | 8                 | regional      | Becker et al. 2018     |
| 4  | Rodents    | 129           | Fleas*                                                      | 202               | regional      | Krasnov et al.<br>2016 |
| 5  | Rodents    | 11            | Fleas*                                                      | 19                | local         | Krasnov et al.<br>2016 |
| 6  | Fish       | 7             | Monogeneans<br>(Gyrodactylidae)                             | 16                | local         | Patella et al. 2017    |

|   |       |    |                                           |    |          |                         |
|---|-------|----|-------------------------------------------|----|----------|-------------------------|
| 7 | Frogs | 15 | Monogeneans                               | 13 | regional | Badets et al. 2011      |
| 8 | Frogs | 31 | Lungworms<br>( <i>Rhabdias</i> spp.)      | 18 | regional | Müller et al. 2018      |
| 9 | Frogs | 7  | Gut worms<br>( <i>Oswaldocruzia</i> spp.) | 5  | local    | Willkens et al.<br>2021 |

---

Note: \*Include different parasite groups

240

241 *Characterization of the ecological and evolutionary patterns of parasites*

242 We compared both the structure of turnover of parasite species (ecological pattern) and  
243 the imbalance of parasite phylogenies (evolutionary pattern) in the empirical studies with  
244 those resulting from the simulations. To characterise the composition of parasite species we  
245 used the metric that gives information about the beta diversity of multiple-site dissimilarities  
246 ( $\beta_{SOR}$  - Baselga 2010; 2013a, b). The beta diversity may reflect two different phenomena:  
247 turnover ( $\beta_{SIM}$ ) and nestedness ( $\beta_{NES}$ ) (Baselga et al. 2007; Baselga 2010; 2013a, b). Here, we  
248 choose only to work with the Simpson-based multiple-site dissimilarity, that is turnover  
249 ( $\beta_{SIM}$ ), since it is non-dependent on species richness (Baselga et al. 2007; Baselga 2010). This  
250 refers to the replacement of some species by others as a consequence of environmental sorting  
251 or spatial and historical constraints. In our case, we compared the variation in parasite species  
252 composition between host species. The Simpson-based multiple-site dissimilarity is then:

253 
$$\beta_{SIM} = \frac{[\sum_{i < j} \min(b_{ij}, b_{ji})]}{2[\sum_i s_i - S_T] + [\sum_{i < j} \min(b_{ij}, b_{ji})]}, \quad (4)$$

254 where  $S_i$  is the total number of species in site  $i$ ,  $S_T$  is the total number of species in all sites  
255 (hosts in our case) and  $\min(b_{ij}, b_{ji})$  is the minimal number of species exclusive to sites  $i$  and  $j$   
256 in pairwise comparison (Baselga 2010).

257 To characterise the structure of the phylogenetic trees we used the metric that gives  
258 information about the tree imbalance. Tree imbalance is one of the most common  
259 phylogenetic structural patterns and measures asymmetries between the numbers of species on  
260 each side of the tree's branches (Marquitti et al. 2020). Tree imbalance is widely measured  
261 using the Sackin index ( $I$ ) (Sackin 1972; Blum and François 2005; Frost and Volz 2013;  
262 Dearlove and Frost 2015). The  $I$  has a dependence on the number of leaves, making it  
263 unsuitable for comparing trees with different numbers of species. To make this comparison  
264 possible, we use the normalised Sackin index ( $I_n$ ) given by:

$$265 \quad I_n(R) = \frac{I(R) - E[I(R)]}{\sqrt{\sigma_R^2}}, \quad (5)$$

266 where tree imbalance is the  $I(R)$ , and  $E(I_n)$  and  $\sigma_R^2$  the expected and variance of trees  
267 generated by the Yule model which have the same number of leaves (species) as the observed  
268 tree (Cardona et al. 2013; Marquitti et al. 2020). Although  $I_n(R)$  would be close to zero for  
269 trees generated with the Yule model, independent of the species richness  $R$ , different modes  
270 of speciation may introduce important deviations from the behaviour of the Yule model  
271 (Marquitti et al. 2020).

272 As each empirical study represents particular ecological and evolutionary processes, we  
273 analysed whether there was an optimal range of host-switching intensity in our simulated  
274 cases that retrieves information about turnover ( $\beta_{SIM}$ ) and normalised Sackin index ( $I_n$ ) of each  
275 study. We considered that simulations that reproduced both the  $\beta_{SIM}$  and the  $I_n$  metrics  
276 simultaneously (within a  $\pm 5\%$  confidence interval) were the best fit to the empirical  
277 examples. Then we compared the best fitting of host-switching intensity among the empirical  
278 studies to understand how it varied for different evolutionary histories. Although species  
279 extinctions occur in the model, this aspect was not included in the analyses since we do not  
280 have information about extinctions in the empirical studies. These analyses were performed

281 using ‘ape’ (Paradis and Schliep 2019), ‘betapart’ (Baselga et al. 2018) ‘picante’ (Kembel et  
282 al. 2010), ‘phytools’ (Revell 2012), and ‘vegan’ (Oksanen et al. 2013) R packages. See the  
283 details in SI3.

284

### 285 *Statistical analysis*

286 To test whether the spatial scale modulates the best fitting host-switching intensities, a  
287 linear mixed-effects model (LMM) was performed using the *lmer* function from the ‘lme4’  
288 package (Bates et al. 2015). We assumed the host-switching intensity as the response variable,  
289 the spatial scale as a fixed variable, and empirical studies were treated as random variables  
290 (intensity~ scale+(1|study)). After performing the LMM analysis, an analysis of variance  
291 (ANOVA) was used to determine significant differences (p-value  $\leq 0.01$ ) using the Anova  
292 function in the ‘car’ package (Fox and Weisberg 2019). All statistical analyses were  
293 performed in R v.4.0.0 (R Core Team 2020) and Rstudio v.1.3.959 (RStudio Team 2020).

294

## 295 RESULTS

296 The turnover and normalised Sackin index of parasites varied according to the mean  
297 percentage of parasite individuals that switch hosts during the entire history of the host  
298 community (the host-switching intensity). To illustrate the turnover and normalised Sackin  
299 index according to the host-switching intensity, we present an example of a model application  
300 with fleas associated with rodents (ID. 5, Fig. 3a-c). As expected, turnover decreases as host-  
301 switching intensity increases (Fig. 3a and Fig. S14). This occurs because the increase of host-  
302 switching promotes the interaction of different host species with the same parasite species.  
303 Additionally, for each value of host-switching intensity, there is a small variation in the

304 turnover (Fig. 3a and Fig. S14). The only exception was ID. 4, which resulted in a wide  
 305 variation in turnover under high host-switching intensity (Fig. S14).

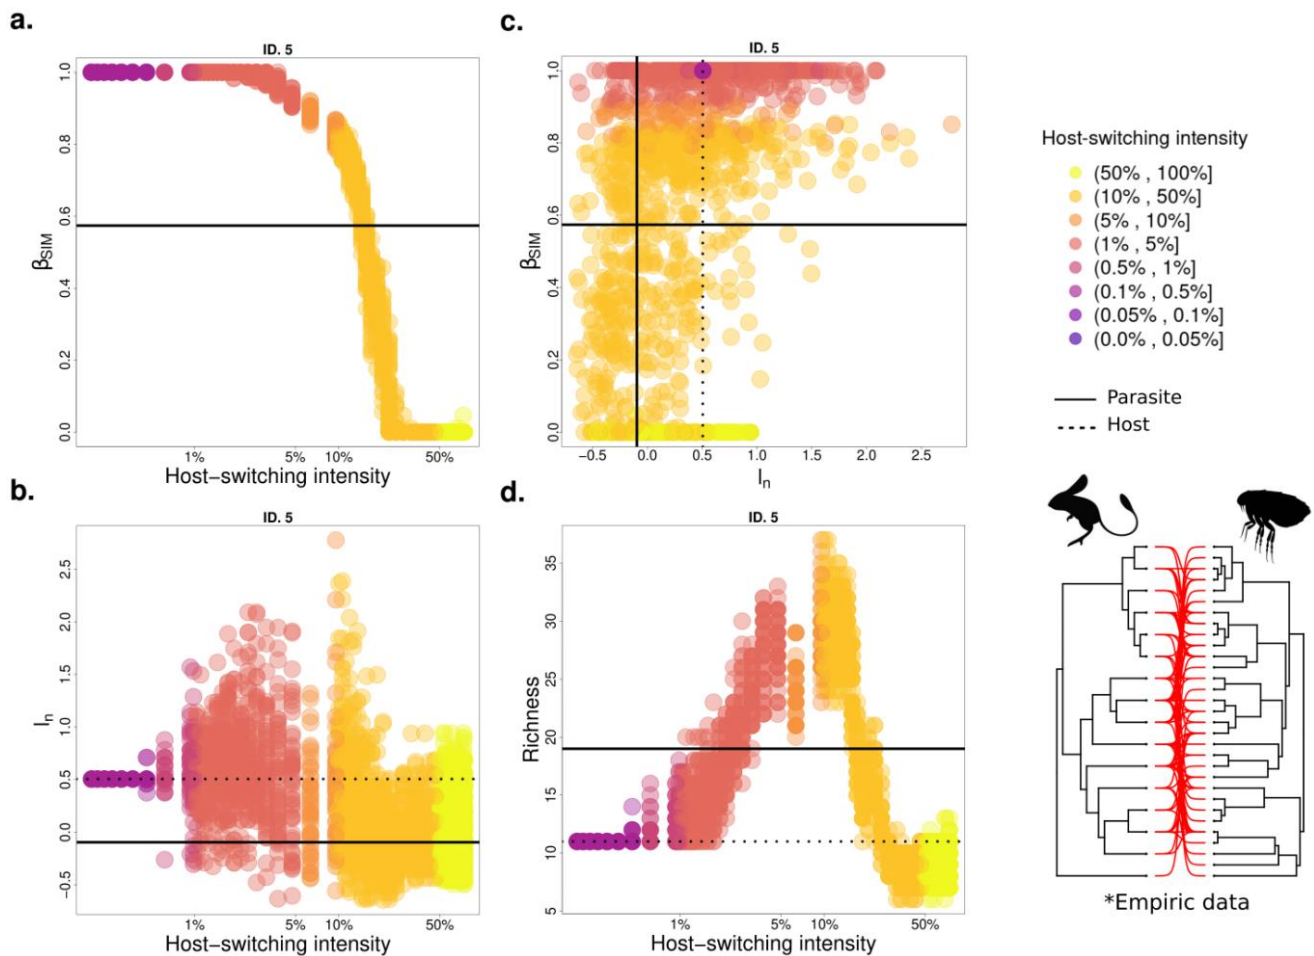

306  
 307 FIGURE 3. Influence of host-switching events on the eco-evolutionary patterns of simulated  
 308 parasites for fleas associated with rodents (see Table 1 for details). Here we demonstrated the  
 309 relationship between: **a.** Host-switching intensity and turnover of parasite species ( $\beta_{SIM}$ )  
 310 between host species; **b.** Host-switching intensity and parasite normalised Sackin index ( $I_n$ ); **c.**  
 311 Relationship between  $\beta_{SIM}$ ,  $I_n$ , and the host-switching intensity. **d.** Host-switching intensity  
 312 and parasite richness. The lines refer to empirical information of parasite (continuous) and  
 313 host (dotted). The colored dots are redundant with the x-axis scale of graphs (a) and (b) but  
 314 intend to guide the interpretation of (c). A total of 50 replicates were performed with 250  
 315 individuals for each configuration of the parameters of host-switching intensity.



316

317 As imposed by the model, the parasite richness ends the same as hosts in the absence of  
318 host-switching (Fig. S16). But, for intermediary values of host-switching, parasites can  
319 colonise the new host and then speciate, resulting in an overwhelming increase in parasite  
320 speciation (see the dynamics in the movie available in S17, Fig. S18, and Fig. 3d).

321 When host-switching intensity is low (below 1%), the normalised Sackin index ( $I_n$ ) for  
322 the simulated parasite phylogenies results in the exactly same value as the one obtained from  
323 the empirical phylogeny of the host (note the dashed line in Fig. 3b and also Fig. S15). This is  
324 because the low host-switching intensity does not allow the establishment of the parasite in a  
325 new host and, as a consequence, the simulated parasite phylogenies have the same normalised  
326 Sackin index of the empirical host phylogeny. Colonisation followed by speciation is more  
327 likely to occur under a higher host-switching intensity, in which the normalised Sackin index  
328 varies over simulations even when they are under the same host-switching intensity (Fig. 3b  
329 and Fig. S15). The wide variation in the normalised Sackin index for a given host-switching  
330 intensity reveals that stochastic host-switching events, even if host-switching is more likely to  
331 occur between closely related species, can change the structure of the resulting phylogenetic  
332 tree. Despite not having a monotonic tendency, the normalised Sackin index tends towards  
333 zero (balanced tree) as host-switching intensity goes to one, regardless of the community (Fig.  
334 S15), resembling a neutral speciation scenario Yule model (Yule 1924; Aldous 2001).

335 For all empirical studies analysed, there is a range of host-switching intensity that  
336 simultaneously reproduces the observed turnover and the parasite normalised Sackin index  
337 (Fig. 4). As mentioned, both metrics are sensitive to host-switching intensity but each one  
338 varies independently of the other (see in Fig. 4). Generally, the turnover and the parasite  
339 normalised Sackin index obtained under high host-switching intensity (greater than 50%) are

340 far from the empirical pattern (see Fig. 4, the yellow dots rarely approach the intersection of  
341 the solid lines).

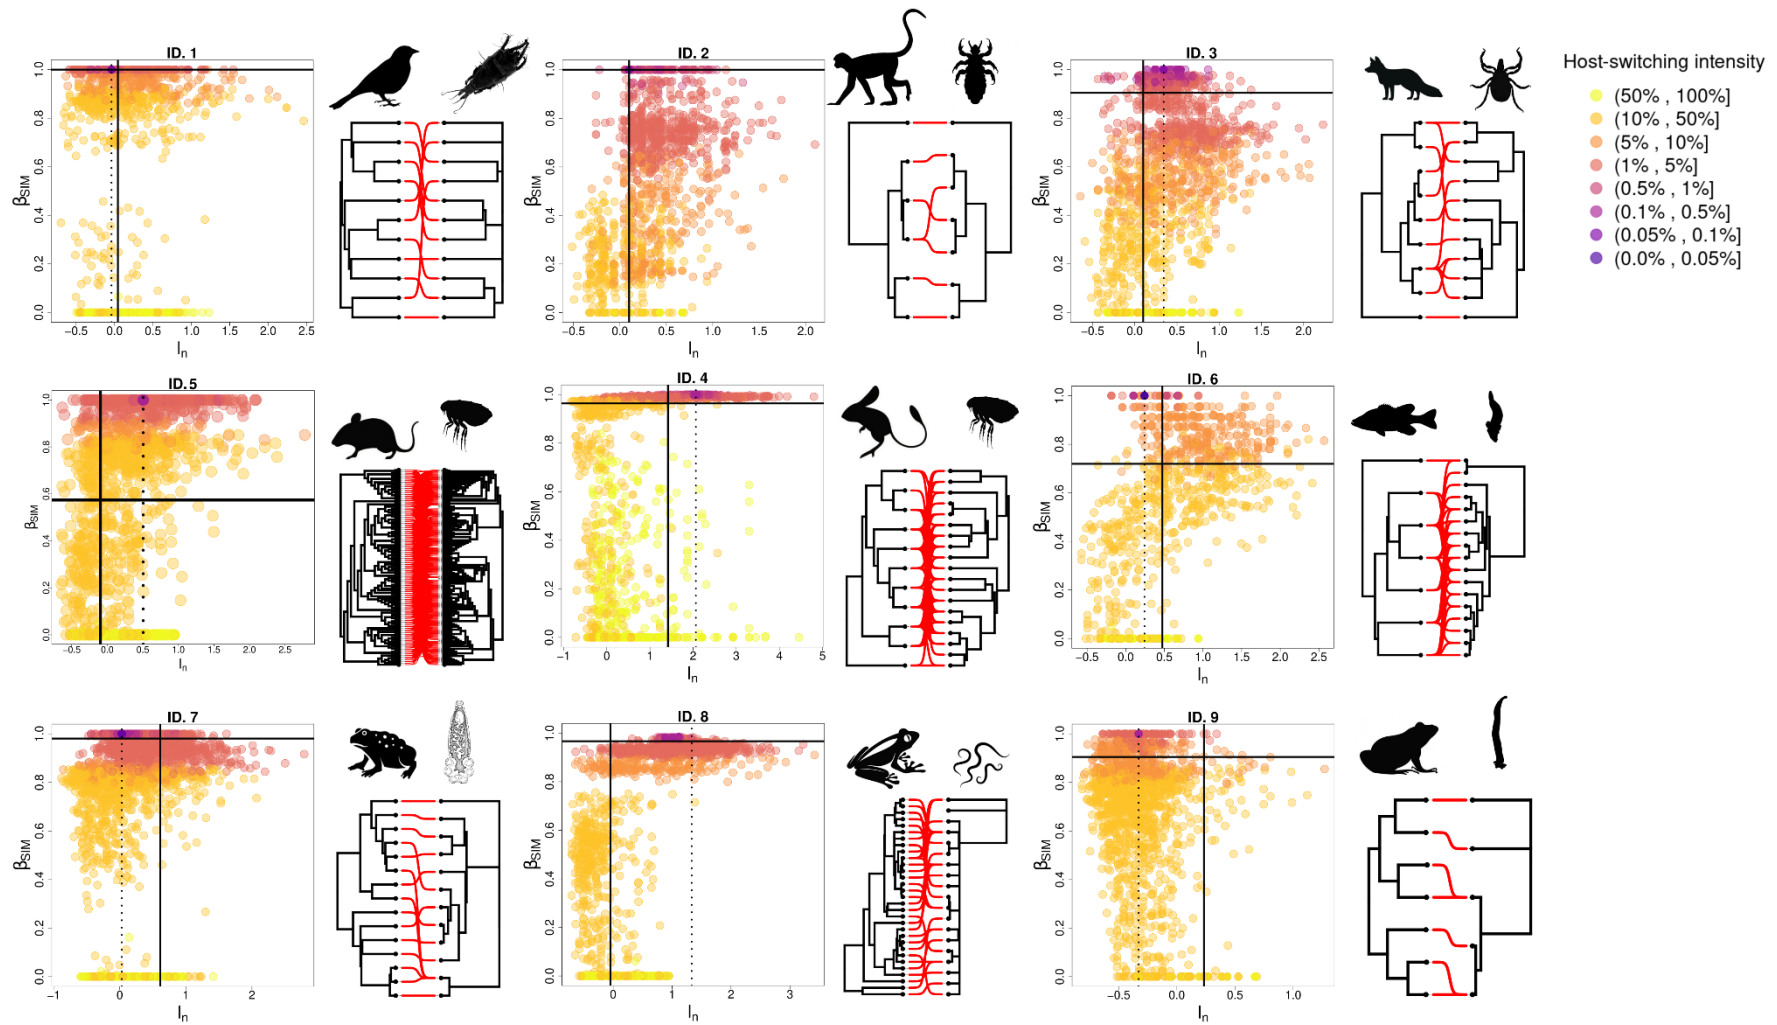

342  
 343 FIGURE 4. The relationship between variation in the turnover of parasite species, normalised Sackin index of parasite species, and host-  
 344 switching intensity for nine empirical studies: the parasites' turnover, measured by the metric turnover( $\beta_{SIM}$ ) on the y-axis and the

345 normalised Sackin index ( $I_n$ ) on the x-axis. Each ID represents an empirical case. The lines refer to empirical information of parasite  
346 (continuous) and host (dotted). Colour scales represent each percentage interval of host-switching intensity. A total of 50 runs were  
347 performed with 250 individuals of carrying capacity, for each configuration of the parameters of host-switching intensity.

348 The simulated host-switching intensity that simultaneously fit parasite turnover  
349 and normalized Sackin index recovered a range of 0.06% to 22.07% of host-switching  
350 intensity through the analysed empirical studies. Within this range, the associations  
351 between mammals and lice presented the lowest host-switching intensity (case ID. 2  
352 with 0.07% - 1.13%), followed by that involving wildlife and arthropod parasites (case  
353 ID. 3 with 0.43% - 2.69%), frogs and monogeneans (case ID. 7 with 0.22% - 3.71%),  
354 frogs and lungworms (case ID. 8 with 1.99% - 4.94%), frogs and gut worms (case ID. 9  
355 with 5.29% - 9.35%), birds and feather mites (case ID. 1 with 0.06% - 8.17%), fish and  
356 monogeneans (case ID. 6 with 8.26% - 11.64%), - the highest intensities of host-  
357 switching were observed between rodents and fleas (case ID. 5 with 14.45% - 16.87%  
358 and case ID. 4 with 0.43% - 22.07%). We also observed that the host-switching events  
359 are more frequent in studies conducted in a local scale (blue colour in Fig. 5) than in  
360 regional scales (salmon colour in Fig. 3) (LMM: relationship of host-switching intensity  
361 on spatial scale:  $\beta = 0.08$ ,  $SE = 0.01$ ,  $df = 6.92$ ,  $t = 5.25$ ,  $p = 0.001$ , ANOVA:  $F =$   
362  $27.56$ ,  $p = 0.001$ , Fig. 5).

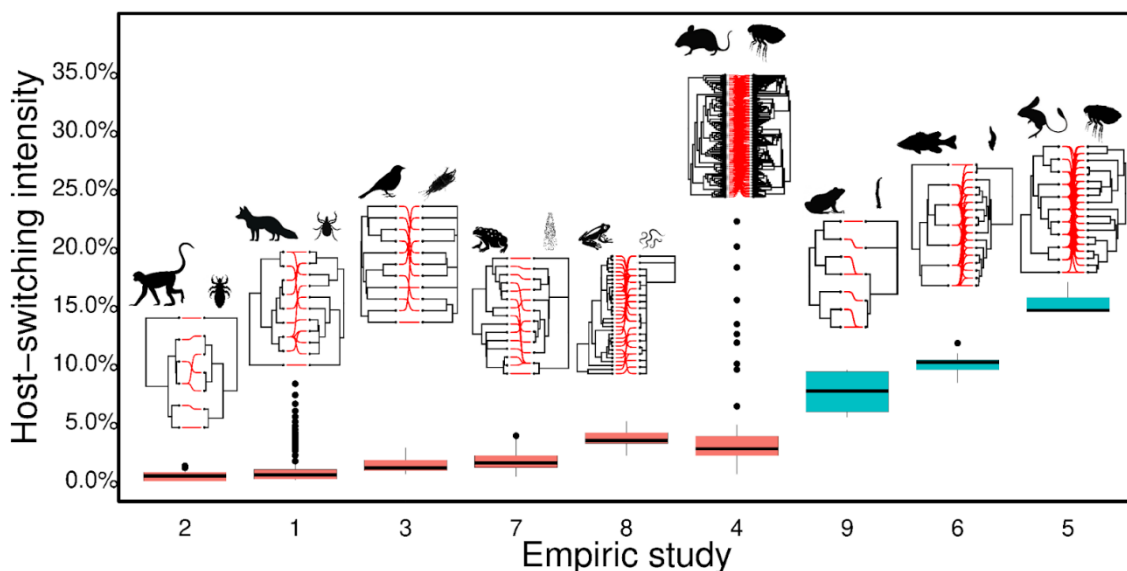

363  
364 FIGURE 5. Calculated host-switching intensity among empirical studies. The boxplots  
365 show the distributions of simulated host switching intensities for each empirical study.

366 Regional spatial scale studies are represented by salmon, and local scale studies are in  
367 blue. The number in axis x represents the empirical studies: ID. 1 - Birds and feather  
368 mites. ID. 2 - Mammals and lice. ID. 3 - Wildlife and ectoparasites. ID. 4 and 5 -  
369 Rodents and fleas. ID. 6 - Fish and Monogeneans (Gyrodactylidae). ID. 7 - Frogs and  
370 monogeneans (Polystomatidae). ID. 8 - Frogs and lungworms (*Rhabdias* spp.). ID. 9 -  
371 Frogs and gut worms (*Oswaldocruzia* spp.).

372

### 373 DISCUSSION

374 In this study, we developed a novel methodological framework to understand how  
375 the intensity of host-switching shapes some aspects of ecological and evolutionary  
376 patterns of parasites, here characterised by species interaction turnover and tree  
377 imbalance, respectively. Our three main results are 1) We found an optimum range of  
378 host-switching intensity that can predict similar patterns as those observed in the  
379 empirical studies, which validates our model; 2) The model showed that the increase of  
380 host-switching intensity promoted an increase in turnover, but the tree imbalance did  
381 not follow any monotonic tendency. Moreover, for a specific host-switching intensity,  
382 we observed a small variation in the turnover and a wide variation in the tree imbalance;  
383 3) The predicted values of host-switching intensity varied among the empirical studies  
384 and those at a local spatial scale resulted in values higher than the ones at the regional  
385 scale.

386 The fact that our model rebuilt the eco-evolutionary patterns of all empirical  
387 studies supports the idea that host-switching mediated by host evolutionary proximity is  
388 a good predictor of parasite associations. According to the framework of the Stockholm  
389 Paradigm (Brooks et al. 2019), parasites can colonise new host species due to pre-  
390 existing compatibility, which is expressed when there is an opportunity for contact.

391 Compatibility emerges greatly from the ancestral capacity in which both hosts and  
392 parasites must be physiologically compatible to establish a long-term association  
393 (Brooks and McLennan 2002; Kolbe et al. 2004; Brooks et al. 2019). Hence, for a given  
394 lineage of the parasite, the closer (phylogenetically) the original and the new host  
395 species, the greater the possibility that the adequate resource is conserved or is at least  
396 similar. In fact, phylogenetic proximity has been widely recognized as a potential  
397 criterion to anticipate new associations (Streicker et al. 2010; Damas et al. 2020; Filion  
398 et al. 2022).

399 Another element of the Stockholm Paradigm (Brooks et al. 2019) that we  
400 observed over the temporal dynamics of our model is the Oscillation Hypothesis (Janz  
401 and Nylin 2008): parasites first increase their host repertoire (generalise) and then  
402 speciate (specialise). In our model, at each time step, a parasite individual can switch  
403 hosts, promoting the increase of host repertoire for the parasite species. However, as we  
404 assume that the probability of host-switching decreases as hosts diverge, given time, the  
405 probability of individuals from the same parasite species maintaining the gene flow  
406 between those host species decreases, and parasite speciation is likely to occur (see the  
407 dynamics in the movie available in S17 and S18). Consequently, in our model, host-  
408 switches promote host repertoire oscillation, as hypothesised by Janz and Nylin (2008),  
409 and favour parasites to speciate at a greater rate than their host, which is empirically  
410 evidenced (Poulin and Morand 2000). Although the main argument behind the  
411 difference in speciation rate between host and parasite is the parasite's shorter life cycle,  
412 we support the idea that frequent host exploitation is another important mechanism to  
413 parasite diversification (Hay et al. 2020, Boeger et al. 2022).

414 The tree imbalance did not have a monotonic tendency and showed a wide  
415 variation for a given host-switching intensity. This reveals that stochastic events can

416 change the evolutionary trajectory of parasites. Although our model assumed that host-  
417 switching most likely occurs between closely related species, eventually, a parasite can  
418 switch to a phylogenetically distant host, changing the diversification history  
419 completely. This distant host-switching was observed in most of the empirical studies  
420 presented here, where the parasites were able to colonise hosts from different genera (ID  
421 2 and 6), families (IDs 1, 4, 5, 7, 8, and 9), and even order (ID 3). For example, in study  
422 ID8 the *Rhabdias* lung-worm anuran parasites occurred mostly in Bufonidae hosts and  
423 only one species in the Hylidae host (Müller et al. 2018). Species extinction is another  
424 class of stochastic event present in our model that could contribute to the varied outputs  
425 on parasite evolution. As we use data only of extant species, when a species goes extinct  
426 all its history is lost, also impacting the imbalance of the tree (Costa et al. 2019,  
427 Marquitti 2020).

428 Unlike the tree imbalance, our results showed that the turnover has a monotonic  
429 tendency: it decreased as the host-switching intensity increased. This pattern was  
430 expected since the model imposes that as host-switching intensity increases, the  
431 limitation to use a new host decrease (Fig. 2). Moreover, we did not observe a wide  
432 variation in the turnover for a given host-switching intensity over the model  
433 replications. This reveals that those stochastic events mentioned before cannot produce  
434 significant changes in the turnover. It probably occurs because when host-switching  
435 occurs, it produces a decrease in the turnover no matter what parasite species switched  
436 to what host species. In other words, the identities of the species are not relevant since  
437 turnover emerges not from a given species characteristic, but from the similarities  
438 between species, or even spatial and temporal amplitudes (Fallon et al. 2004, Baselga et  
439 al. 2007, Baselga, et al. 2022). This reinforces the idea that species turnover is a robust



440 metric to compare species assemblages (Baselga, et al. 2022) and may also be a good  
441 proxy for host-switching intensity.

442 The host-switching intensity varied across empirical studies and we observed that  
443 it is higher in empirical studies of local spatial scale than regional spatial scale. This  
444 evidence shows that the amplitude of the spatial scale is a fundamental factor in  
445 determining the extent of host-switching. The opportunity for interaction is larger in  
446 host empirical studies at a local scale, as this reduces the likelihood that barriers exist,  
447 hampering the encounter of potential actors. This is evident when comparing rodent and  
448 flea associations at regional (ID. 4) and local spatial scales (ID. 5). Similarly, since the  
449 association of *Rhabdias* spp. and frogs (ID. 8) are defined geographically (and not by  
450 host taxa) it was assumed that host-switching by ecological fitting was evolutionarily  
451 more important than association with particular host taxa (Kuzmin et al. 2014; Müller et  
452 al. 2018). Different intensities of host-switching observed in our results may also be  
453 influenced by biological variations of the species that make up the empirical studies  
454 analysed. For instance, these studies include a great diversity of organisms (fleas, lice,  
455 feather mites, helminths, platyhelminthes), with profound differences in their biological  
456 characteristics. Expanding analyses to a broader sample of empirical studies, including  
457 variations in the type of parasitism (e.g., mono vs. heteroxenic, ecto vs. endoparasite)  
458 and host attributes can provide important insights into key features related to the process  
459 of incorporation of new hosts.

460 In nature, host-parasite systems are more complex than those modelled here.  
461 Although the model can reconstruct eco-evolutionary patterns of empirical studies, our  
462 model has some limitations. For example, the carrying capacity of all host species is the  
463 same and the host's body size, their abundances, and spatial distribution were not  
464 explicitly considered. The selective pressure is not explicitly modelled, contrary to what

465 we observe in nature (Krasnov et al. 2005, Krasnov et al. 2021). Furthermore, all  
466 parasite individuals and species are equivalent, and may compete for the same  
467 resources. Except for resource competition, our model didn't consider intra and  
468 interspecific interactions among parasites. Finally, the phylogenies are still scarce,  
469 especially for parasite species, which limited the number of tests with the model.  
470 Phylogenetic data on parasites is extremely important to clarify the role of host-  
471 switching in the ecological and evolutionary patterns of parasite lineages. Still, we  
472 recovered compatible eco-evolutionary patterns for modelled parasites and their  
473 respective hosts. Our model has important implications for predicting host switching,  
474 especially in scenarios of anthropogenic change. With anthropogenic changes constantly  
475 modifying natural environments and altering the geographic distribution of parasites,  
476 many species that were once restricted to specific areas are now expanding their range  
477 into new geographic locations and changing the composition of communities (see  
478 Brooks et al. 2014). As we showed, parasites can follow different evolutionary paths,  
479 and eventually can switch to non-related hosts, ultimately, determining the migration of  
480 a parasite to other species (and clades), in some cases, including humans. To conclude,  
481 we show that a model in which host-switching mediated by evolutionary proximity  
482 between hosts is a predictor for parasitic associations over evolutionary time, as well as  
483 for the origins of parasite diversity. We see this as an important step in our  
484 understanding of parasite diversification processes.

485

486 SUPPLEMENTARY MATERIAL

487       Data SI

488

489 DATA AVAILABILITY

490 The model, phylogenies, and interactions of all analysed studies are available at  
491 [https://github.com/elviradbastiani/host\\_switching\\_model](https://github.com/elviradbastiani/host_switching_model).

492

#### 493 ACKNOWLEDGEMENTS

494 We thank the researchers who collected and reported the field data, our  
495 institutions, and the many colleagues who helped us in different ways during this project  
496 for their comments and suggestions, especially to Professor Dr. Marcus Aguiar. EDB is  
497 grateful for the Ph.D. degree scholarship provided by Capes (Coordenação de  
498 Aperfeiçoamento de Pessoal de Nível Superior). The authors acknowledge the  
499 computational support from Professor Carlos M. de Carvalho at LFTC-DFis-UFPR.

500

#### 501 FINANCIAL SUPPORT

502 EDB was supported by Brazilian Coordination for the Improvement of Higher  
503 Education Personnel (CAPES). DP was supported by the São Paulo Research  
504 Foundation (FAPESP), grants #2018/11187-8, #2019/24449-3, and #2016/01343-7  
505 (ICTP-SAIFR). SBLA was supported by Conselho Nacional de Desenvolvimento  
506 Científico e Tecnológico (CNPq: #11284/2021-3).

507

#### 508 AUTHORS CONTRIBUTION

509 Conceived and designed the experiments: EDB, SBLA and DP

510 Performed the experiments and analysed the data: EDB, SBLA and DP

511 Wrote the paper: EDB, SLB, KMC, DP, WB, FMDM

512 Other contributions: EDB, DP, FMDM, WB, KMC and SLBA

513

#### 514 CONFLICT OF INTEREST

515 The authors declare that they have no conflict of interest.

516

517 REFERENCES

518 Agosta S. J., Janz N., Brooks D. R. 2010. How specialists can be generalists: resolving  
519 the "parasite paradox" and implications for emerging infectious disease.

520 *Zoologia (Curitiba)*, 27(2), 151-162.

521 Agosta S. J., Klemens J. A. 2008. Ecological fitting by phenotypically flexible  
522 genotypes: implications for species associations, community assembly and  
523 evolution. *Ecology Letters*, 11, 1123-1134.

524 Agosta S. J., Brooks D. R. 2020. The major metaphors of evolution: Darwinism then  
525 and now (Vol. 2). Springer Nature, Switzerland AG. pp. XVII - 273.

526 Aldous D. J. 2001. Stochastic models and descriptive statistics for phylogenetic trees,  
527 from Yule to today. *Statistical Science*, 16, 23-34.3

528 Araujo S. B., Braga M. P., Brooks D. R., Agosta S. J., Hoberg E. P., von Hartenthal F.  
529 W., Boeger W. A. 2015. Understanding host-switching by ecological fitting.  
530 *PLoS One*, 10(10), e0139225.

531 Baselga A., Jiménez-Valverde A., Niccolini G. 2007. A multiple-site similarity measure  
532 independent of richness. *Biology Letters*, 6, 642-645.

533 Baselga A. 2010. Partitioning the turnover and nestedness components of beta diversity.  
534 *Global ecology and biogeography*, 19, 134-143.

- 535 Baselga A. 2013a. Separating the two components of abundance-based dissimilarity:  
536 balanced changes in abundance vs. abundance gradients. *Methods in Ecology*  
537 *and Evolution*, 4, 552-557.
- 538 Baselga A. 2013b. Multiple site dissimilarity quantifies compositional heterogeneity  
539 among several sites, while average pairwise dissimilarity may be misleading.  
540 *Ecography*, 36, 124-128.
- 541 Baselga A., Orme D., Villéger S., De Bortoli J., Leprieur F., Logez M., Henriques-Silva  
542 R. 2018. Partitioning beta diversity into turnover and nestedness components.  
543 Package 'betapart'. Version, 1(1).
- 544 Baselga A., Gómez-Rodríguez C., Araújo M. B., Castro-Insua A., Arenas M., Posada  
545 D., Vogler A. P. 2022. Joint analysis of species and genetic variation to quantify  
546 the role of dispersal and environmental constraints in community turnover.  
547 *Ecography*, e05808.
- 548 Bates D., Maechler M., Bolker B., Walker S., Christensen R. H. B., Singmann H.  
549 Grothendieck G. 2011. Package 'lme4'. Linear mixed-effects models using S4  
550 classes. R package version, 1(6).
- 551 Blum M. G. François O. 2005. On statistical tests of phylogenetic tree imbalance: the  
552 Sackin and other indices revisited. *Mathematical biosciences*, 195, 141-153.
- 553 Boeger W. A., Brooks D. R., Trivellone V., Agosta S., Hoberg E. 2022. Ecological  
554 Super-Spreaders Drive Host-Range Oscillations: Omicron and Risk-Space for  
555 Emerging infectious Disease. In press.
- 556 Boyd B. M., Nguyen N. P., Allen J. M., Waterhouse R. M., Vo K. B., Sweet A. D.,  
557 Johnson K. P. 2022. Long-distance dispersal of pigeons and doves generated

- 558 new ecological opportunities for host-switching and adaptive radiation by their  
559 parasites. *Proceedings of the Royal Society B*, 289(1970), 20220042.
- 560 Braga M. P. Janz N. 2021. Host repertoires and changing insect–plant interactions.  
561 *Ecological Entomology*, 46, 1241–1253.
- 562 Brooks D. R., McLennan D. A. 2002. *The nature of diversity*. University of Chicago  
563 Press.
- 564 Brooks D. R., Hoberg E. P. Boeger W. A. 2019. *The Stockholm paradigm: climate  
565 change and emerging disease*. University of Chicago Press, pp. 400.
- 566 Brooks D. R., Hoberg E. P., Boeger W. A., Gardner S. L., Galbreath K. E., Herczeg D.  
567 Dursahinhan A. T. 2014. Finding them before they find us: informatics,  
568 parasites, and environments in accelerating climate change. *Comparative  
569 Parasitology*, 81, 155-164.
- 570 Bush S. E., Sohn E. Clayton D. H. 2006. Ecomorphology of parasite attachment:  
571 experiments with feather lice. *Journal of Parasitology*, 92, 25-31.
- 572 Cardona G., Mir A., Rosselló F. 2013. Exact formulas for the variance of several  
573 balance indices under the Yule model. *Journal of Mathematical Biology*, 67(6),  
574 1833-1846.
- 575 Charleston M. A. Robertson D. L. 2002. Preferential host switching by primate  
576 lentiviruses can account for phylogenetic similarity with the primate phylogeny.  
577 *Systematic biology*, 51, 528-535.

- 578 Costa C. L., Lemos-Costa P., Marquitti F. M., Fernandes L. D., Ramos, M. F.,  
579 Schneider D. M. de Aguiar M. A. 2019. Signatures of microevolutionary  
580 processes in phylogenetic patterns. *Systematic biology*, 68, 131-144.
- 581 Cuthill J. H. Charleston M. A. 2013. A simple model explains the dynamics of  
582 preferential host switching among mammal RNA viruses. *Evolution:*  
583 *International Journal of Organic Evolution*, 67, 980-990.
- 584 Damas J., Hughes G. M., Keough K. C., Painter C. A., Persky N. S., Corbo M. Lewin  
585 H. A. 2020. Broad host range of SARS-CoV-2 predicted by comparative and  
586 structural analysis of ACE2 in vertebrates. *Proceedings of the National*  
587 *Academy of Sciences*, 117, 22311-22322.
- 588 De Vienne D. M., Refrégier G., López-Villavicencio M., Tellier A., Hood M. E. Giraud  
589 T. 2013. Cospeciation vs host-shift speciation: methods for testing, evidence  
590 from natural associations and relation to coevolution. *New Phytologist*, 198,  
591 347-385.
- 592 Dearlove B. L., Frost S. D. 2015. Measuring asymmetry in time-stamped phylogenies.  
593 *PLoS computational biology*, 11(7), e1004312.
- 594 Dominguez M., de la Colina M. A., Di Giacomo A. G., Reboreda J. C., Mahler B. 2015.  
595 Host switching in cowbird brood parasites: how often does it occur? *Journal of*  
596 *evolutionary biology*, 28(6), 1290-1297.
- 597 Downton M. Austin A. D. 1995. Increased genetic diversity in mitochondrial genes is  
598 correlated with the evolution of parasitism in the Hymenoptera. *Journal of*  
599 *Molecular Evolution*, 41, 958-965.

- 600 Engelstädter J. Fortuna N. Z. 2019. The dynamics of preferential host switching: Host  
601 phylogeny as a key predictor of parasite distribution. *Evolution*, 73, 1330-1340.
- 602 Fallon S. M., Ricklefs R. E., Latta S. C., Bermingham E. 2004. Temporal stability of  
603 insular avian malarial parasite communities. *Proceedings of the Royal Society of*  
604 *London. Series B: Biological Sciences*, 271(1538), 493-500.
- 605 Fecchio A., Wells K., Bell, J.A., Tkach V. V., Lutz H. L., Weckstein J. D. Clark N. J.  
606 2019. Climate variation influences host specificity in avian malaria parasites.  
607 *Ecology Letters*, 22, 547-557.
- 608 Filion A., Doherty J. F., Poulin R., Godfrey S. S. 2022. Building a comprehensive  
609 phylogenetic framework in disease ecology. *Trends in Parasitology*.
- 610 Fox J. Weisberg S. 2019. *Nonlinear Regression, Nonlinear Least Squares, and*  
611 *Nonlinear Mixed Models in R*. population, 150, 200.
- 612 Frost S. D., Volz E. M. 2013. Modelling tree shape and structure in viral  
613 phylodynamics. *Philosophical Transactions of the Royal Society B: Biological*  
614 *Sciences*, 368(1614), 20120208.
- 615 Gavrilets S. Hastings A. 1996. Founder effect speciation: a theoretical reassessment.  
616 *The American Naturalist*, 147, 466-491.
- 617 Habermannová J., Bogusch P., Straka J. 2013. Flexible host choice and common host  
618 switches in the evolution of generalist and specialist cuckoo bees (*Anthophila:*  
619 *Sphecodes*). *PLoS One*, 8(5), e64537.



- 620 Hay E. M., Poulin R., Jorge F. 2020. Macroevolutionary dynamics of parasite  
621 diversification: A reality check. *Journal of Evolutionary Biology*, 33(12), 1758-  
622 1769.
- 623 Hayward A., Poulin R. Nakagawa S. 2021. A broadscale analysis of host-symbiont  
624 cophylogeny reveals the drivers of phylogenetic congruence. *Ecology Letters*,  
625 24, 1681–1696.
- 626 Higgs P. G., Derrida B. 1991. Stochastic models for species formation in evolving  
627 populations. *Journal of Physics A: Mathematical and General*, 24(17), L985.
- 628 Imrie R. M., Roberts K. E. Longdon B. 2021. Between virus correlations in the outcome  
629 of infection across host species: Evidence of virus by host species interactions.  
630 *Evolution letters*, 5, 472-483.
- 631 Janz N., Nylin S. 2008. The oscillation hypothesis of host-plant range and speciation.  
632 *Specialization, speciation, and radiation: the evolutionary biology of herbivorous*  
633 *insects*, 2008, 203-215.
- 634 Jaramillo M. Rivera-Parra J. L. 2018. Host-Switching: How It Starts. In *Disease*  
635 *Ecology*. Springer, Cham, pp. 139-156.
- 636 Kembel S.W., Cowan P.D., Helmus M. R., Cornwell W. K., Morlon H., Ackerly D. D.  
637 Webb C. O. 2010. *Picante: R tools for integrating phylogenies and ecology*.  
638 *Bioinformatics*, 26, 1463-1464.
- 639 Kolbe J. J., Glor R. E., Rodríguez Schettino L., Lara A. C., Larson A., Losos J. B. 2004.  
640 Genetic variation increases during biological invasion by a Cuban lizard. *Nature*,  
641 431(7005), 177-181.

- 642 Krasnov B. R., Burdelova N. V., Khokhlova I. S., Shenbrot G. I., Degen A. 2005.  
643 Larval interspecific competition in two flea species parasitic on the same rodent  
644 host. *Ecological Entomology*, 30(2), 146-155.
- 645 Krasnov B. R., Spickett A., Junker K., Van der Mescht L., Matthee S. 2021. Functional  
646 and phylogenetic uniqueness of helminth and flea assemblages of two South  
647 African rodents. *International journal for parasitology*, 51(10), 865-876.
- 648 Kuzmin Y., de Vasconcelos Melo F. T. Dos Santos J. N. 2014. A new species of  
649 *Serpentirhabdias* Tkach, Kuzmin Snyder, 2014 (Nematoda: Rhabdiasidae)  
650 parasitic in the brown ground snake *Atractus major* Boulenger (Reptilia:  
651 Serpentes: Dipsadidae) in Brazil. *Systematic Parasitology*, 89, 101-106.
- 652 Light J. E. Hafner M. S. 2007. Cophylogeny and disparate rates of evolution in  
653 sympatric lineages of chewing lice on pocket gophers. *Molecular phylogenetics  
654 and evolution*, 45, 997-1013.
- 655 Manzo F., Peliti L. 1994. Geographic speciation in the Derrida-Higgs model of species  
656 formation. *Journal of Physics A: Mathematical and General*, 27(21), 7079.
- 657 Marquitti F. M. D., Fernandes L. D., de Aguiar M. A. M. 2020. Allopatry increases the  
658 balance of phylogenetic trees during radiation under neutral speciation.  
659 *Ecography*, 43(10), 1487-1498.
- 660 Mayr E. 1999. *Systematics and the origin of species, from the viewpoint of a zoologist.*  
661 Harvard University Press, pp. 372.
- 662 Meinilä M., Kuusela J., Ziętara M. S., Lumme J. 2004. Initial steps of speciation by  
663 geographic isolation and host switch in salmonid pathogen *Gyrodactylus salaris*

- 664 (Monogenea: Gyrodactylidae). *International Journal for Parasitology*, 34(4),  
665 515-526.
- 666 Nylin S., Slove J. Janz N. 2014. Host plant utilization, host range oscillations and  
667 diversification in nymphalid butterflies: a phylogenetic investigation. *Evolution*,  
668 68, 105-124.
- 669 Nylin S., Agosta S., Bensch S., Boeger W. A., Braga M. P., Brooks D. R. Janz, N.  
670 2018. Embracing colonizations: a new paradigm for species association  
671 dynamics. *Trends in ecology evolution*, 33, 4-14.
- 672 Oksanen J., Blanchet F. G., Kindt R., Legendre P., Minchin P. R., O'hara R. B.  
673 Oksanen M. J. 2013. Package 'vegan'. *Community ecology package*, version, 2,  
674 1-295.
- 675 Poulin R., Morand S. 2000. The diversity of parasites. *The quarterly review of biology*,  
676 75(3), 277-293.
- 677 Revell L. J. 2012. phytools: an R package for phylogenetic comparative biology (and  
678 other things). *Methods in ecology and evolution*, 3, 217-223.
- 679 Sackin M. J. 1972. "Good" and "bad" phenograms. *Systematic Biology*, 21(2), 225-226.
- 680 Sanaei E., Charlat S., Engelstädter J. 2021. *Wolbachia* host shifts: routes, mechanisms,  
681 constraints and evolutionary consequences. *Biological Reviews*, 96(2), 433-453.
- 682 Streicker D. G., Turmelle A. S., Vonhof M. J., Kuzmin I. V., McCracken G. F.  
683 Rupprecht C. E. 2010. Host phylogeny constrains cross-species emergence and  
684 establishment of rabies virus in bats. *Science*, 329, 676-679.

- 685 Team R. 2020. RStudio: Integrated Development for R. RStudio, PBC, Boston, MA.  
686 Available at: <https://www.rstudio.com/>. Last accessed 10 november 2021.
- 687 Team R. C. 2020. R: A Language and Environment for Statistical Computing. R  
688 Foundation for Statistical Computing, Vienna, Austria: Available at:  
689 <https://www.R-project.org/>. Last accessed 10 november 2021.
- 690 Woolhouse M. E., Haydon D. T., Antia R. 2005. Emerging pathogens: the epidemiology  
691 and evolution of species jumps. *Trends in ecology & evolution*, 20(5), 238-244.
- 692 Yule U. G. 1925. A mathematical theory of evolution, based on the conclusions of Dr.  
693 JC Willis, FRS. *Philosophical Transactions of the Royal Society of London*  
694 Series B, 213, 21-87.
- 695 [Dataset] Badets M., Whittington I., Lalubin F., Allienne J. F., Maspimby J. L., Bentz S.  
696 Verneau O. 2011. Correlating early evolution of parasitic platyhelminths to  
697 Gondwana breakup. *Systematic Biology*, 60, 762-781. Accession number:  
698 EDB\_10.1093/sysbio/syr078
- 699 [Dataset] Becker D. J., Streicker D. G. Altizer S. 2018. Using host species traits to  
700 understand the consequences of resource provisioning for host–parasite  
701 interactions. *Journal of Animal Ecology*, 87, 511-525. Accession number:  
702 EDB\_10.1111/1365-2656.12765
- 703 [Dataset] Doña J., Sweet A. D., Johnson K. P., Serrano D., Mironov S. Jovani R. 2017.  
704 Cophylogenetic analyses reveal extensive host-shift speciation in a highly  
705 specialized and host-specific symbiont system. *Molecular phylogenetics and*  
706 *evolution*, 115, 190-196. Accession number:  
707 EDB\_10.1016/j.ympev.2017.08.005

- 708 [Dataset] Krasnov B. R., Shenbrot G. I., Khokhlova I. S. Degen A. A. 2016. Trait-  
709 based and phylogenetic associations between parasites and their hosts: a case  
710 study with small mammals and fleas in the Palearctic. *Oikos*, 125, 29-38.  
711 Accession number: EDB\_10.1111/oik.02178
- 712 [Dataset] Müller M. I., Morais D. H., Costa-Silva G. J., Aguiar A., Avila R.W. da Silva  
713 R. J. 2018. Diversity in the genus *Rhabdias* (Nematoda, Rhabdiasidae):  
714 Evidence for cryptic speciation. *Zoologica Scripta*, 47, 595-607. Accession  
715 number: EDB\_10.1111/zsc.12304
- 716 [Dataset] Patella L., Brooks D. R. Boeger W. A. 2017. Phylogeny and ecology  
717 illuminate the evolution of associations under the Stockholm paradigm:  
718 *Aglaiogyrodactylus* spp. (Platyhelminthes, Monogenoidea, Gyrodactylidae) and  
719 species of Loricariidae (Actinopterygii, Siluriformes). *Vie Et Milieu*, 67, 91-102.  
720 Accession number: EDB\_20183235432
- 721 [Dataset] Reed D. L., Light J. E., Allen J. M. Kirchman J. J. 2007. Pair of lice lost or  
722 parasites regained: the evolutionary history of anthropoid primate lice. *Bmc*  
723 *Biology*, 5, 1-11. Accession number: EDB\_10.1186/1741-7007-5-7
- 724 [Dataset] Willkens Y., Furtado A. P., Dos Santos J. N. de Vasconcelos Melo F. T.  
725 2021. Do host habitat use and cospeciation matter in the evolution of  
726 *Oswaldocruzia* (Nematoda, Molineidae) from neotropical amphibians? *Journal*  
727 *of Helminthology*, 95, e33. Accession number:  
728 EDB\_10.1017/S0022149X21000250
- 729
- 730
